# Supplementary material
Source: PubMed Central journal article supplement (PMC6924508)
Supplement: NIHMS1546143-supplement-2.pdf [file NIHMS1546143-supplement-2.pdf]

## Supplemental Appendix

List of contents:

Complete list of members of the SCVSA Study Group

Table S1. CFTR mutations in subjects enrolled in this study

Figure S1. Timeline for collection of cultures, lung function tests, pulmonary exacerbation histories, and treatment histories during the study period

Table S2. SCV culture positivity by study site

Figure S2. Frequency of isolation of *Staphylococcus aureus* normal colony (NC) and small-colony variants (SCVs) from respiratory specimens collected from study subjects, by MRSA status

Table S3. Culture findings for subjects at baseline and SCV culture status during the study

Figure S3. SCV detection patterns for the 64 subjects with SCVs detected at least once at baseline or during the study (Visits 1-7)

Table S4. Characteristics of subjects positive for SCVs at 1 or more study visits

Table S5. Mean GLI FEV<sub>1pp</sub> over time by SCV status and auxotrophic type

Table S6. Association of SCVs with GLI FEV<sub>1pp</sub> in univariate and multivariate analyses

Table S7. Unadjusted and adjusted analyses of association of SCVs and changes in GLI FEV<sub>1pp</sub>

Table S8. Association of lung function with frequency of SCV detection

Table S9. Prevalence of pulmonary exacerbations by SCV status and auxotrophic type

Table S10. Association of SCVs and occurrence of pulmonary exacerbations in univariate and multivariate analyses

Table S11. Association of pulmonary exacerbations with frequency of SCV detection

Table S12. Association between treatment and subsequent SCV detection in multivariate analysis

Table S13. SCV auxotrophic types cultured from CF subjects

Table S14. Association of SCV subtypes and GLI FEV<sub>1pp</sub> in univariate and multivariate analyses

Table S15. Association of SCVs with lung function based on MRSA status in univariate and multivariate analyses

Table S16. Association of SCVs and occurrence of pulmonary exacerbations based on MRSA status in univariate and multivariate analyses

Table S17. Analysis of the association of lung function and history of antibiotic use during the study

Table S18. Analysis of the association of pulmonary exacerbation and history of antibiotic use during the study

Table S19. History and frequency of antibiotic treatment during the study

Table S20. Frequency of sulfonamide treatment of MSSA and MRSA culture-positive subjects during the study

Table S21. STROBE statement

## Complete list of members of the SCVSA study group

Daniel Wolter<sup>1,2</sup>  
Frankline Onchiri<sup>2</sup>  
Julia Emerson<sup>1,2</sup>  
Mimi Precit<sup>1</sup>  
Michael Lee<sup>1</sup>  
Sharon McNamara<sup>2</sup>  
Laura Nay<sup>2</sup>  
Marcella Blackledge<sup>2</sup>  
Ahmet Uluer<sup>3,4</sup>  
David Orenstein<sup>5</sup>  
Michelle Mann<sup>6</sup>  
Wynton Hoover<sup>7</sup>  
Ronald Gibson<sup>1,2</sup>  
Jane Burns<sup>1,2</sup>  
Lucas Hoffman<sup>1,2</sup>  
Xuan Qin<sup>2</sup>  
Anne Marie Buccat<sup>2</sup>  
Alan Genatossio<sup>2</sup>  
Nicoline Schaap<sup>6</sup>  
Omalee Lopez<sup>6</sup>  
Kathy Doan<sup>3</sup>  
Robert Fowler<sup>3</sup>  
Khadija Iken<sup>3</sup>  
Kelsey Little<sup>3</sup>  
Elizabeth Hartigan<sup>5</sup>  
Kathryn Little<sup>5</sup>  
Heather Hathorne<sup>7</sup>  
Susan Keeling<sup>7</sup>  
Katie Slaten<sup>7</sup>

<sup>1</sup>University of Washington   <sup>2</sup>Seattle Children's Hospital   <sup>3</sup>Boston Children's Hospital  
<sup>4</sup>Brigham and Women's Hospital   <sup>5</sup>University of Pittsburgh   <sup>6</sup>Texas Children's Hospital  
<sup>7</sup>University of Alabama

**Table S1. CFTR mutations in subjects enrolled in this study.**

| <b>Mutation<sup>1</sup></b> | <b>Frequency</b> | <b>Percent</b> | <b>Cumulative<sup>2</sup>%</b> |
|-----------------------------|------------------|----------------|--------------------------------|
| F508del                     | 201              | 87.39          | 87.39                          |
| G542X                       | 3                | 1.30           | 88.70                          |
| G551D                       | 4                | 1.74           | 90.43                          |
| N1303K                      | 6                | 2.61           | 93.04                          |
| R553X                       | 3                | 1.30           | 94.35                          |
| 1717-1G->A                  | 1                | 0.43           | 94.78                          |
| 621+1G->T                   | 1                | 0.43           | 95.22                          |
| G85E                        | 1                | 0.43           | 95.65                          |
| I507del                     | 1                | 0.43           | 96.09                          |
| 3659delC                    | 2                | 0.87           | 96.96                          |
| R560T                       | 1                | 0.43           | 97.39                          |
| Other                       | 6                | 2.61           | 100                            |
| Total                       | 230              | 100            |                                |

| <b>Mutation<sup>2</sup></b> | <b>Frequency</b> | <b>Percent</b> | <b>Cumulative<sup>3</sup>%</b> |
|-----------------------------|------------------|----------------|--------------------------------|
| F508del                     | 129              | 56.09          | 56.09                          |
| G542X                       | 7                | 3.04           | 59.13                          |
| G551D                       | 8                | 3.48           | 62.61                          |
| N1303K                      | 9                | 3.91           | 66.52                          |
| W1282X                      | 3                | 1.30           | 67.83                          |
| R117H                       | 1                | 0.43           | 68.26                          |
| 1717-1G->A                  | 4                | 1.74           | 70.00                          |
| 621+1G->T                   | 2                | 0.87           | 70.87                          |
| 2789+5G->A                  | 1                | 0.43           | 71.30                          |
| 3849+10kbC->T               | 2                | 0.87           | 72.17                          |
| R1162X                      | 1                | 0.43           | 72.61                          |
| 3120+1G->A                  | 1                | 0.43           | 73.04                          |
| I507del                     | 4                | 1.74           | 74.78                          |
| 3659delC                    | 1                | 0.43           | 75.22                          |
| R560T                       | 1                | 0.43           | 75.65                          |
| 2184delA                    | 2                | 0.87           | 76.52                          |
| 711+1G->T                   | 1                | 0.43           | 76.96                          |
| Unknown                     | 1                | 0.43           | 77.39                          |
| Other                       | 52               | 22.61          | 100                            |
| Total                       | 230              | 100            |                                |

Figure S1. Timeline for collection of cultures, lung function tests, pulmonary exacerbation histories, and treatment histories during the study period.

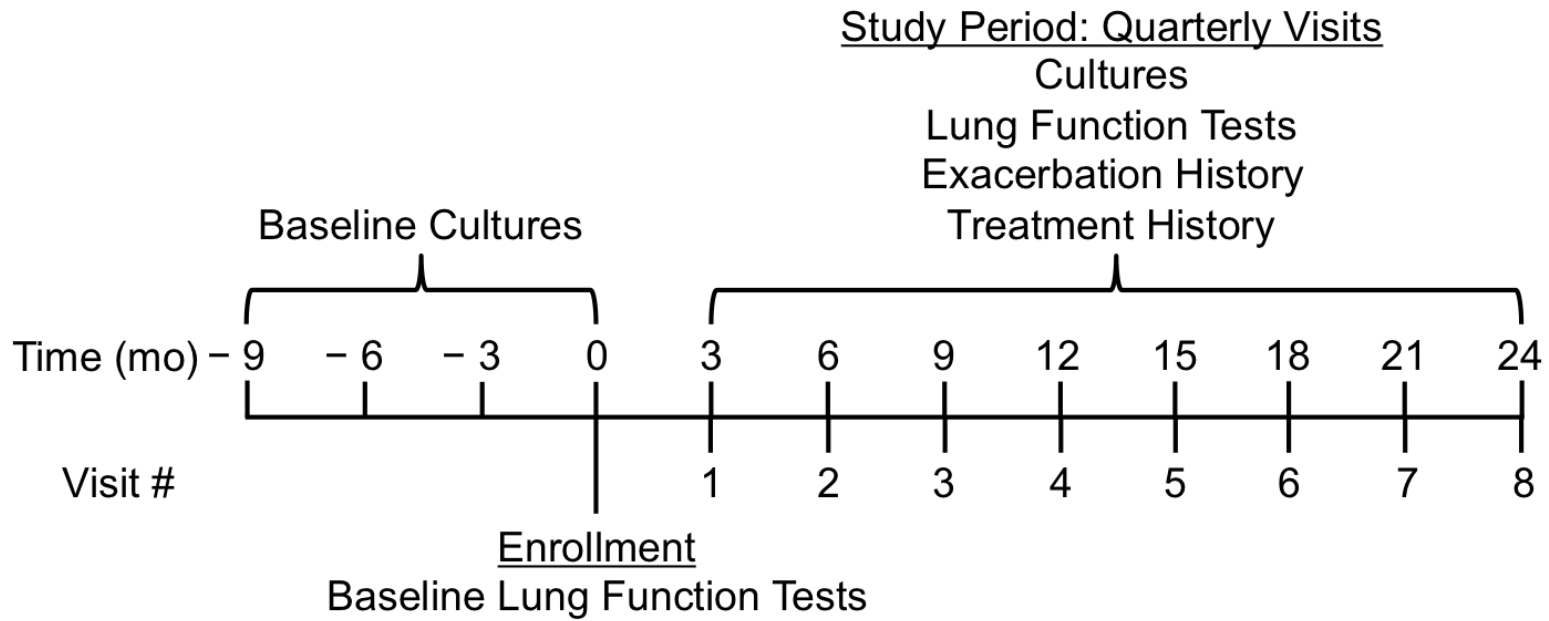

**Table 52. HSV culture positivity at each site.**

| Site         | N <sup>a</sup> | Ever HSV Pos <sup>b</sup> |
|--------------|----------------|---------------------------|
| Boston       | 51             | 18 (35.3%) <sup>b</sup>   |
| Baylor       | 50             | 7 (14.0%)                 |
| Pittsburgh   | 50             | 17 (34.0%)                |
| Seattle      | 29             | 6 (20.7%)                 |
| Alabama      | 50             | 16 (32.0%)                |
| <b>Total</b> | <b>230</b>     | <b>64 (27.8%)</b>         |

<sup>a</sup> Total # of patients (N) per site

<sup>b</sup> Number (Percent) of HSV culture-positive subjects per site

**Figure S2. Frequency of isolation of *Staphylococcus aureus* normal colony (NC) and small-colony variants (SCVs) from respiratory specimens collected from study subjects, by MRSA status.**

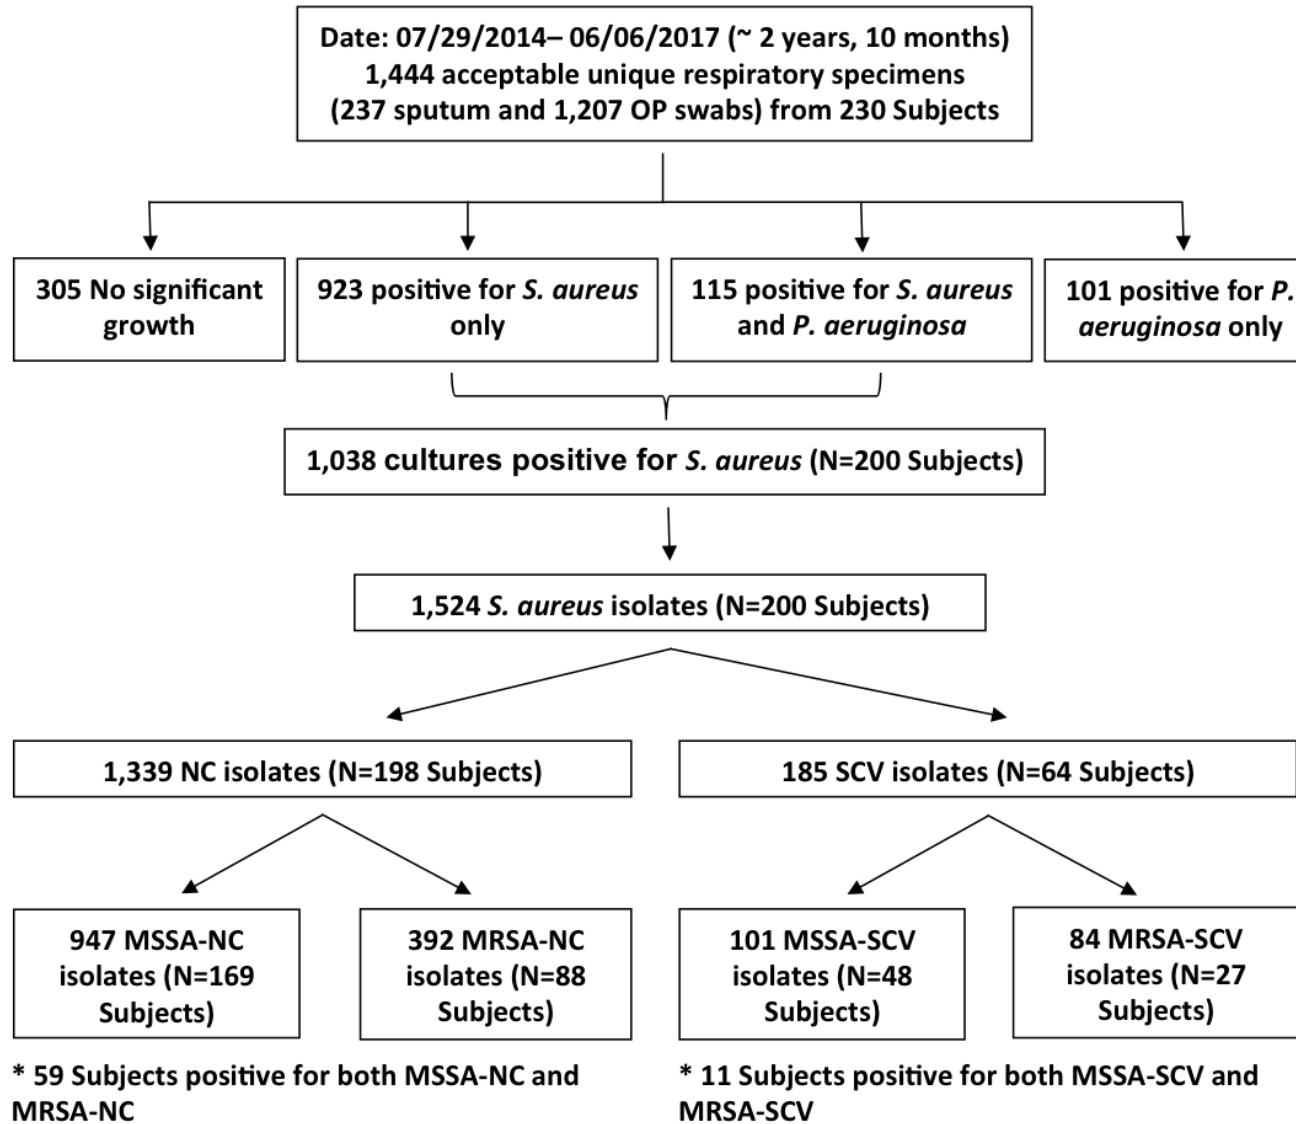

**Table 53. Culture findings for subjects at baseline and SCV culture status during the study.**

| Organism                            | Baseline Culture <sup>a</sup>       | SCV Culture Status During Study <sup>b</sup> |                                     | p-value |
|-------------------------------------|-------------------------------------|----------------------------------------------|-------------------------------------|---------|
|                                     | Total Popul <sup>c</sup><br>(N=230) | Never SCV Pos <sup>c</sup><br>(N=166)        | Ever SCV Pos <sup>c</sup><br>(N=64) |         |
| <i>Pseudomonas aeruginosa</i>       | 66 (28.7%) <sup>c</sup>             | 49 (29.5%)                                   | 17 (26.6%)                          | 0.66    |
| <i>Staphylococcus aureus</i>        | 185 (80.4%)                         | 124 (74.7%)                                  | 61 (95.3%)                          | 0.0004  |
| MRSA                                | 57 (24.8%)                          | 34 (20.5%)                                   | 23 (35.9%)                          | 0.0150  |
| MSSA-SCV                            | 13 (5.7%)                           | 4 (2.4%)                                     | 9 (14.1%)                           | 0.0006  |
| MRSA-SCV                            | 1 (0.4%)                            | 0 (0.0%)                                     | 1 (1.6%)                            | 0.11    |
| <i>Burkholderia cepacia</i> complex | 7 (3.0%)                            | 5 (3.0%)                                     | 2 (3.1%)                            | 0.96    |
| <i>Haemophilus</i> species          | 51 (22.2%)                          | 40 (24.1%)                                   | 11 (17.2%)                          | 0.26    |
| <i>Stenotrophomonas maltophilia</i> | 47 (20.4%)                          | 37 (22.3%)                                   | 10 (15.6%)                          | 0.26    |
| <i>Achromobacter</i> sp.            | 6 (2.6%)                            | 4 (2.4%)                                     | 2 (3.1%)                            | 0.76    |
| Nontuberculous mycobacteria (NTM)   | 1 (0.4%)                            | 1 (0.6%)                                     | 0 (0.0%)                            | 0.53    |
| Other                               | 212 (92.2%)                         | 152 (91.6%)                                  | 60 (93.8%)                          | 0.58    |

<sup>a</sup> Baseline organisms represented those detected at any of 3 visits prior to enrollment by their respective study site; SCV detection protocols varied by site. Mean baseline samples per subject was 3 (SD 0.35).

<sup>b</sup> Culture status during the study only included post-enrollment cultures and were determined by the central study laboratory.

<sup>c</sup> Number (Percent) of subjects culture-positive at baseline for the organisms listed and the subsequent detection of SCVs during the study in these same subjects.



**Figure S3. SCV detection patterns for the 64 subjects with SCVs detected at least once during the study (Visits 1-9). Each row of circles represents the culture results for one SCV culture-positive subject (y-axis, subject number). Open circles, cultures negative for SCVs; closed (red) circles, SCV-positive cultures. Baseline cultures were performed at each subject's respective site; SCV detection protocols varied by site. All study visit cultures were performed at the central study laboratory.**

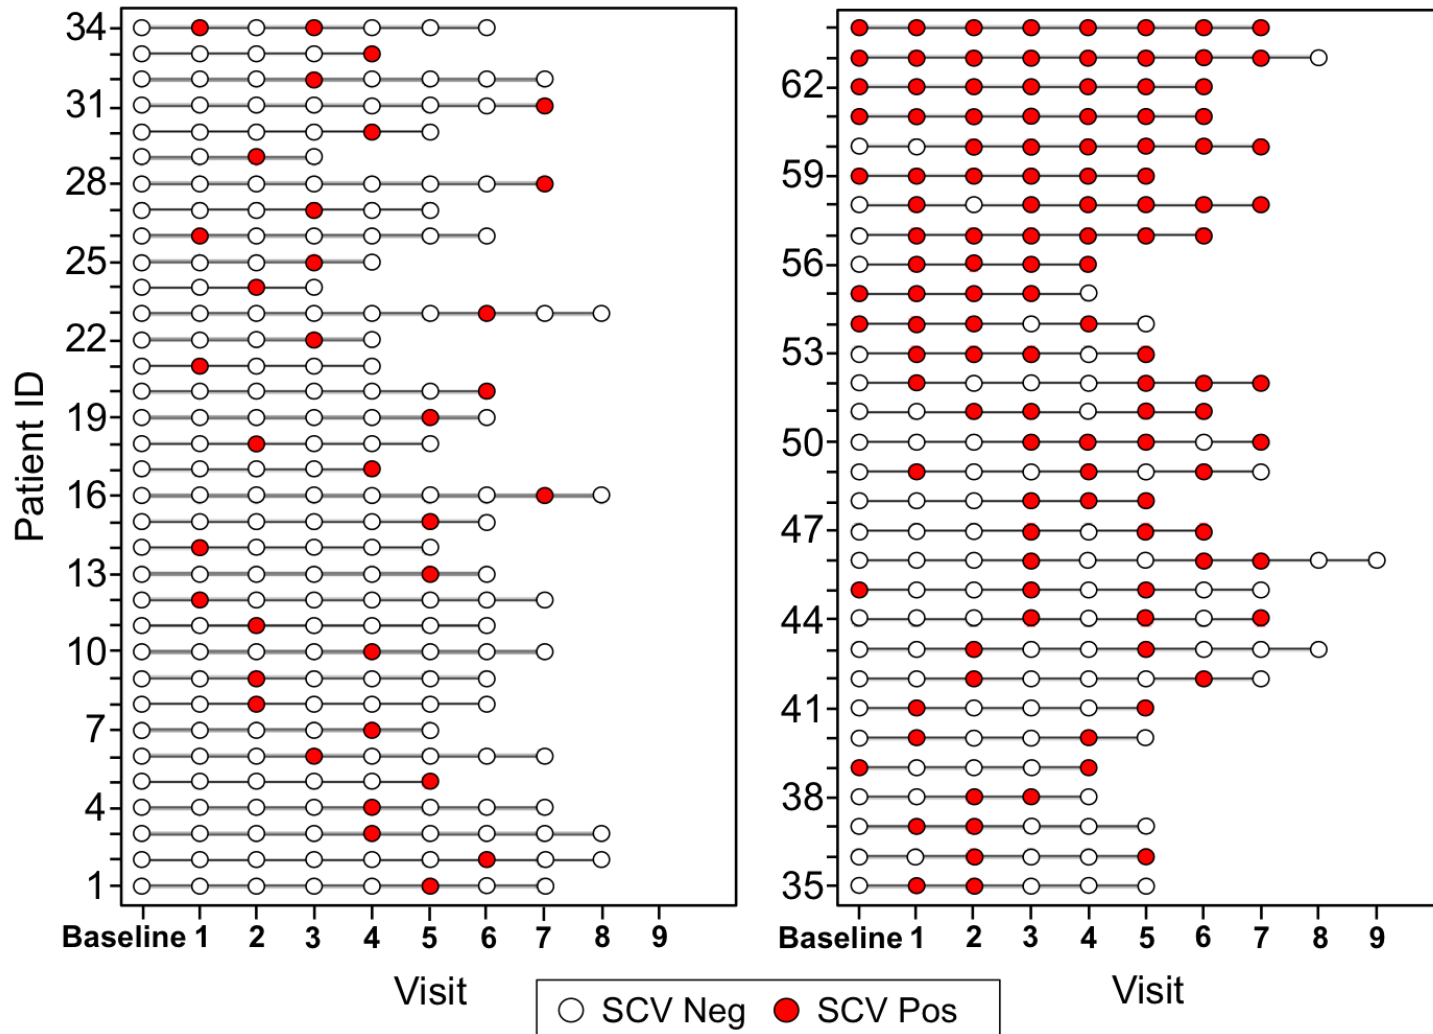

**Table S4. Characteristics of Subjects positive for SCVs at 1 or more study visits.**

| Demographics/Characteristics <sup>b</sup> | Frequency of SCV Cx Positivity <sup>a</sup> |                  | p-value |
|-------------------------------------------|---------------------------------------------|------------------|---------|
|                                           | SCV Cx Pos (n/N)                            | SCV Cx Pos (n/N) |         |
| Age at Enrollment                         | 12.7 (3.0)                                  | 12.2 (3.0)       | 0.54    |
| Sex                                       |                                             |                  | 0.97    |
| Male                                      | 16 (47%)                                    | 14 (47%)         |         |
| Female                                    | 18 (53%)                                    | 16 (53%)         |         |
| Genotype                                  |                                             |                  | 0.84    |
| 508 homozygous                            | 20 (59%)                                    | 18 (60%)         |         |
| 508 heterozygous                          | 9 (26%)                                     | 9 (30%)          |         |
| Other                                     | 5 (15%)                                     | 3 (10%)          |         |
| GLI-EV1pp                                 | 86.31 (23.69)                               | 89.78 (18.06)    | 0.52    |
| SCV Subtype                               |                                             |                  | 0.0013  |
| Ever Non-THYD SCV                         | 25 (74%)                                    | 10 (33%)         |         |
| Ever THYD SCV                             | 9 (26%)                                     | 20 (67%)         |         |

<sup>a</sup>Number of SCV positive cultures during the study

<sup>b</sup>Abbreviations: Cx Pos, culture positive; THYD, thymidine-dependent

**Table 55. Mean GLI FEV<sub>1</sub> ppv over time by SCV status and auxotrophic type.**

| Visit    | Never SCV Pos  |              | Ever SCV Pos (All) |             | Ever Non-THYD <sup>b</sup> SCV Pos |             | Ever THYD SCV Pos |             |
|----------|----------------|--------------|--------------------|-------------|------------------------------------|-------------|-------------------|-------------|
|          | N <sup>a</sup> | Mean ± SD    | N                  | Mean ± SD   | N                                  | Mean ± SD   | N                 | Mean ± SD   |
| Baseline | 164            | 92.4 ± 18.6  | 64                 | 85.5 ± 19.0 | 35                                 | 90.9 ± 16.1 | 29                | 79 ± 20.5   |
| 1        | 157            | 92.4 ± 17.2  | 64                 | 85.5 ± 20.2 | 35                                 | 90.2 ± 14.7 | 29                | 79.9 ± 24.4 |
| 2        | 159            | 91.2 ± 19.9  | 63                 | 83.3 ± 19.9 | 34                                 | 87.9 ± 17.3 | 29                | 77.8 ± 21.7 |
| 3        | 154            | 90.6 ± 18.8  | 63                 | 83.6 ± 20.9 | 35                                 | 87.9 ± 15.9 | 28                | 78.2 ± 25.1 |
| 4        | 147            | 91.1 ± 20.2  | 61                 | 83.2 ± 21.0 | 34                                 | 89.3 ± 14.7 | 27                | 75.5 ± 25.1 |
| 5        | 129            | 90.6 ± 18.8  | 52                 | 83.7 ± 20.6 | 27                                 | 88.1 ± 17.0 | 25                | 79 ± 23.3   |
| 6        | 86             | 91.6 ± 18.1  | 35                 | 83.7 ± 21.5 | 19                                 | 90.8 ± 16.5 | 16                | 75.4 ± 24.2 |
| 7        | 30             | 92.6 ± 21.2  | 15                 | 80.2 ± 31.1 | 9                                  | 96.9 ± 14.5 | 6                 | 55.2 ± 33.4 |
| 8        | 2              | 100.0 ± 24.5 | 4                  | 88.9 ± 35.3 | 3                                  | 106 ± 7.58  | 1                 | 36.8        |

<sup>a</sup>Number of subjects

<sup>b</sup>Abbreviation: THYD, thymidine-dependent.

**Table S6. Association of SCVs with GLI FEV<sub>1</sub> pp in univariate and multivariate analyses.**

| Covariate                      | Univariate          |                  |         | Multivariate |                  |         | Multivariate |                  |         |
|--------------------------------|---------------------|------------------|---------|--------------|------------------|---------|--------------|------------------|---------|
|                                | Coeff. <sup>a</sup> | 95%CI            | p-value | Coeff.       | 95%CI            | p-value | Coeff.       | 95%CI            | p-value |
| SCV Culture Status             |                     |                  |         |              |                  |         |              |                  |         |
| Never SCV Pos*                 | 0                   |                  |         | 0            |                  |         | 0            |                  |         |
| Ever SCV Pos                   | -7.071              | (-12.195--1.948) | 0.0068  | -5.021       | (-10.114-0.071)  | 0.05    | -5.495       | (-10.507--0.483) | 0.0316  |
| Visit number                   | -0.396              | (-0.665--0.128)  | 0.0038  | -0.394       | (-0.662--0.125)  | 0.0040  | -0.394       | (-0.662--0.126)  | 0.0040  |
| Age at enrollment              |                     |                  |         | -1.103       | (-1.833--0.374)  | 0.0030  | -0.929       | (-1.654--0.203)  | 0.0122  |
| Sex                            |                     |                  |         |              |                  |         |              |                  |         |
| Male*                          |                     |                  |         | 0            |                  |         | 0            |                  |         |
| Female                         |                     |                  |         | -3.958       | (-8.412-0.496)   | 0.08    | -3.356       | (-7.750-1.038)   | 0.13    |
| Hispanic race                  |                     |                  |         |              |                  |         |              |                  |         |
| Hispanic*                      |                     |                  |         | 0            |                  |         | 0            |                  |         |
| Non-Hispanic                   |                     |                  |         | -0.705       | (-11.800-10.390) | 0.90    | -2.233       | (-13.178-8.712)  | 0.69    |
| Genotype                       |                     |                  |         |              |                  |         |              |                  |         |
| F508 homozyg*                  |                     |                  |         | 0            |                  |         | 0            |                  |         |
| F508 heterozyg                 |                     |                  |         | 3.783        | (-1.157-8.722)   | 0.13    | 3.103        | (-1.770-7.977)   | 0.21    |
| Other                          |                     |                  |         | 1.222        | (-6.364-8.808)   | 0.75    | 1.178        | (-6.274-8.629)   | 0.76    |
| CFTR Modulator                 |                     |                  |         |              |                  |         |              |                  |         |
| No*                            |                     |                  |         | 0            |                  |         | 0            |                  |         |
| Yes                            |                     |                  |         | 6.530        | (-2.288-15.348)  | 0.15    | 6.043        | (-2.625-14.710)  | 0.17    |
| <i>P. aeruginosa</i> Cx Status |                     |                  |         |              |                  |         |              |                  |         |
| Never PA Pos*                  |                     |                  |         |              |                  |         | 0            |                  |         |
| Ever PA Pos                    |                     |                  |         |              |                  |         | -7.389       | (-12.353--2.425) | 0.0035  |
| Constant                       | 92.653              | (89.843-95.463)  | <0.0001 | 105.87       | (91.749-119.998) | <0.0001 | 107.49       | (93.575-121.407) | <0.0001 |

\*Baseline category

<sup>a</sup>Abbreviations: Coefficient, Coeff.; Confidence Interval, CI; Culture, Cx.

**Table 57. Unadjusted and adjusted analyses of association of SCVs and changes in GLIFEV<sub>1</sub> pp.**

| Covariate                                                   | Univariate |                    |         | Multivariate |                    |         |
|-------------------------------------------------------------|------------|--------------------|---------|--------------|--------------------|---------|
|                                                             | Coeff.     | 95% Conf. Interval | p-value | Coeff.       | 95% Conf. Interval | p-value |
| SCV Culture Status <sup>a</sup>                             |            |                    |         |              |                    |         |
| Never SCV Pos*                                              | 0          |                    |         | 0            |                    |         |
| Ever SCV Pos                                                | -6.157     | (-11.649--0.666)   | 0.0277  | -7.760       | (-13.250--2.260)   | 0.0057  |
| Visit number                                                | -0.375     | (-0.708--0.042)    | 0.0271  | -0.450       | (-0.870--0.040)    | 0.0333  |
| Ever SCV Pos <sup>a</sup> Visit # <sup>a</sup> interaction* | -0.207     | (-0.822-0.408)     | 0.51    | -0.020       | (-0.700-0.650)     | 0.95    |
| Age at enrollment                                           |            |                    |         | -0.450       | (-1.260-0.360)     | 0.28    |
| Sex                                                         |            |                    |         |              |                    |         |
| Male*                                                       |            |                    |         | 0            |                    |         |
| Female                                                      |            |                    |         | -4.400       | (-9.180-0.380)     | 0.07    |
| Hispanic race                                               |            |                    |         |              |                    |         |
| Hispanic*                                                   |            |                    |         | 0            |                    |         |
| Non-Hispanic                                                |            |                    |         | -5.790       | (-19.050-7.460)    | 0.39    |
| Genotype                                                    |            |                    |         |              |                    |         |
| F508 homozyg*                                               |            |                    |         | 0            |                    |         |
| F508 heterozyg                                              |            |                    |         | 3.850        | (-1.360-9.060)     | 0.15    |
| Other                                                       |            |                    |         | -3.010       | (-11.250-5.240)    | 0.47    |
| <i>P. aeruginosa</i> at enrollment                          |            |                    |         |              |                    |         |
| Negative*                                                   |            |                    |         | 0            |                    |         |
| Positive                                                    |            |                    |         | -4.060       | (-9.840-1.720)     | 0.17    |
| MRSA at enrollment                                          |            |                    |         |              |                    |         |
| Negative*                                                   |            |                    |         | 0            |                    |         |
| Positive                                                    |            |                    |         | -3.320       | (-8.850-2.210)     | 0.24    |
| MRSA during study                                           |            |                    |         |              |                    |         |
| Negative*                                                   |            |                    |         | 0            |                    |         |
| Positive                                                    |            |                    |         | -1.140       | (-3.150-0.860)     | 0.26    |
| Constant                                                    | 95.928     | (93.017-98.840)    | <0.0001 | 112.73       | (96.490-128.960)   | <0.0001 |

\* Baseline category

<sup>a</sup> Abbreviations: C, Coefficient; CI, Confidence Interval; Cx, Culture, Cx.

**Table 58: Association of lung function with frequency of SCV detection.**

| Covariate <sup>a</sup>                   | Univariate  |                    |         |
|------------------------------------------|-------------|--------------------|---------|
|                                          | Coefficient | 95% Conf. Interval | p-value |
| Frequency of SCV Positivity <sup>b</sup> |             |                    |         |
| SCV Neg*                                 | 0           |                    |         |
| SCV Pos-1                                | -10.169     | (-16.682--3.656)   | 0.0023  |
| SCV Pos-1?                               | -6.440      | (-13.291-0.412)    | 0.07    |
| Visit number                             | -0.380      | (-0.657--0.102)    | 0.0073  |
| Constant                                 | 93.898      | (90.846-96.950)    | <0.0001 |

\* Baseline category

<sup>a</sup> Abbreviations: Cx Pos, culture positive

<sup>b</sup> Number of SCV positive cultures during the study

**Table 59. Prevalence of pulmonary exacerbations by SCV status and auxotrophic type.**

| Visit <sup>a</sup> | Never SCV Pos          |                         |       | Ever SCV Pos (All) |            |       | Ever Non-THYD SCV Pos |            |       | Ever THYD SCV Pos |            |       |
|--------------------|------------------------|-------------------------|-------|--------------------|------------|-------|-----------------------|------------|-------|-------------------|------------|-------|
|                    | Total (N) <sup>b</sup> | # with PEx <sup>c</sup> | %     | Total (N)          | # with PEx | %     | Total (N)             | # with PEx | %     | Total (N)         | # with PEx | %     |
| 1                  | 166                    | 82                      | 49.4% | 64                 | 34         | 53.1% | 35                    | 17         | 48.6% | 29                | 17         | 58.6% |
| 2                  | 166                    | 62                      | 37.3% | 64                 | 28         | 43.8% | 35                    | 11         | 31.4% | 29                | 17         | 58.6% |
| 3                  | 162                    | 63                      | 38.9% | 64                 | 36         | 56.3% | 35                    | 18         | 51.4% | 29                | 18         | 62.1% |
| 4                  | 158                    | 63                      | 39.9% | 63                 | 38         | 60.3% | 35                    | 17         | 48.6% | 28                | 21         | 75.0% |
| 5                  | 149                    | 50                      | 33.6% | 61                 | 27         | 44.3% | 34                    | 9          | 26.5% | 27                | 18         | 66.7% |
| 6                  | 131                    | 44                      | 33.6% | 52                 | 21         | 40.4% | 27                    | 10         | 37.0% | 25                | 11         | 44.0% |
| 7                  | 91                     | 25                      | 27.5% | 35                 | 16         | 45.7% | 19                    | 7          | 36.8% | 16                | 9          | 56.3% |
| 8                  | 30                     | 8                       | 26.7% | 15                 | 4          | 26.7% | 9                     | 1          | 11.1% | 6                 | 3          | 50.0% |

<sup>a</sup> Visit 1 represented the first quarterly visit after enrollment. Retrospective analysis of pulmonary exacerbations was not performed preventing the addition of baseline values in this table.

<sup>b</sup> Total number of subjects.

<sup>c</sup> Number of subjects with pulmonary exacerbation (PEx) in the study quarter between the indicated study visit and the prior study visit.

**Table 10. Association of SCVs and occurrence of pulmonary exacerbations in univariate and multivariate analyses.**

| Covariate                      | Univariate      |               |         | Multivariate |               |         | Multivariate |               |         | Multivariate |               |          |
|--------------------------------|-----------------|---------------|---------|--------------|---------------|---------|--------------|---------------|---------|--------------|---------------|----------|
|                                | OR <sup>a</sup> | 95%CI         | p-value | OR           | 95%CI         | p-value | OR           | 95%CI         | p-value | OR           | 95%CI         | p-value  |
| SCV Culture Status             |                 |               |         |              |               |         |              |               |         |              |               |          |
| Never SCV Pos*                 | 1.000           |               |         | 1            |               |         | 1            |               |         | 1            |               | ???????? |
| Ever SCV Pos                   | 1.727           | (1.185-2.516) | 0.0045  | 1.546        | (1.065-2.244) | 0.0219  | 1.492        | (1.037-2.147) | 0.0312  | 1.414        | (0.984-2.032) | 0.06     |
| Visit number                   | 0.900           | (0.846-0.958) | 0.0009  | 0.898        | (0.844-0.956) | 0.0007  | 0.898        | (0.844-0.956) | 0.0007  | 0.896        | (0.842-0.954) | 0.0006   |
| Age at enrollment              |                 |               |         | 1.082        | (1.024-1.142) | 0.0046  | 1.097        | (1.040-1.158) | 0.0007  | 1.082        | (1.025-1.142) | 0.0034   |
| Sex                            |                 |               |         |              |               |         |              |               |         |              |               | ?        |
| Male*                          |                 |               |         | 1            |               |         | 1            |               |         | 1            |               | ???????? |
| Female                         |                 |               |         | 1.472        | (1.056-2.051) | 0.0225  | 1.546        | (1.116-2.142) | 0.0088  | 1.482        | (1.073-2.045) | 0.0149   |
| Hispanic race                  |                 |               |         |              |               |         |              |               |         |              |               | ?        |
| Hispanic*                      |                 |               |         | 1            |               |         | 1            |               |         | 1            |               | ???????? |
| Non-Hispanic                   |                 |               |         | 0.763        | (0.335-1.737) | 0.52    | 0.664        | (0.296-1.486) | 0.32    | 0.687        | (0.312-1.510) | 0.35     |
| Genotype                       |                 |               |         |              |               |         |              |               |         |              |               | ?        |
| 508 Homoz*                     |                 |               |         | 1            |               |         | 1            |               |         | 1            |               | ???????? |
| 508 Heteroz                    |                 |               |         | 1.063        | (0.739-1.529) | 0.74    | 1.005        | (0.704-1.437) | 0.98    | 0.997        | (0.700-1.419) | 0.99     |
| Other                          |                 |               |         | 0.720        | (0.408-1.273) | 0.26    | 0.716        | (0.411-1.249) | 0.24    | 0.68         | (0.392-1.181) | 0.17     |
| CFTR Modulator                 |                 |               |         |              |               |         |              |               |         |              |               | ?        |
| No*                            |                 |               |         | 1            |               |         | 1            |               |         | 1            |               | ???????? |
| Yes                            |                 |               |         | 0.550        | (0.279-1.085) | 0.09    | 0.535        | (0.275-1.039) | 0.07    | 0.571        | (0.297-1.098) | 0.09     |
| <i>P. aeruginosa</i> Cx Status |                 |               |         |              |               |         |              |               |         |              |               | ?        |
| Never PA Pos*                  |                 |               |         |              |               |         | 1            |               |         | 1            |               | ???????? |
| Ever PA Pos                    |                 |               |         |              |               |         | 0.547        | (0.377-0.792) | 0.0014  | 0.508        | (0.350-0.737) | 0.0004   |
| GLI FEV1pp at enrollment       |                 |               |         |              |               |         |              |               |         | 0.991        | (0.982-0.999) | 0.0389   |

\* Baseline category

<sup>a</sup> Abbreviations: OR, Odds Ratio; CI, Confidence Interval; Cx, Culture.



**Table S11: Association of pulmonary exacerbations with frequency of SCV detection.**

| Covariate <sup>a</sup>                      | Univariate |                    |         |
|---------------------------------------------|------------|--------------------|---------|
|                                             | Odds Ratio | 95% Conf. Interval | p-value |
| Frequency of SCV Cx Positivity <sup>b</sup> |            |                    |         |
| SCV Neg*                                    | 1          |                    |         |
| SCV Cx Pos=1                                | 1.221      | (0.749-1.992)      | 0.42    |
| SCV Cx Pos>1                                | 2.166      | (1.293-3.627)      | 0.0034  |
| Visit number                                | 0.933      | (0.873-0.997)      | 0.0422  |

\* Baseline category

<sup>a</sup> Abbreviations: Cx Pos, Culture positive

<sup>b</sup> Number of SCV positive cultures during the study

**Table S12: Association between treatment and subsequent SCV detection in a multivariate analysis.**

| Covariate <sup>b</sup> | Multivariate <sup>a</sup> |                    |         |
|------------------------|---------------------------|--------------------|---------|
|                        | Odds Ratio                | 95% Conf. Interval | p-value |
| Aminoglycoside         |                           |                    |         |
| █████ No*              | 1                         |                    |         |
| █████ Yes              | 1.417                     | (0.765-2.626)      | 0.27    |
| Beta-lactam            |                           |                    |         |
| █████ No*              | 1                         |                    |         |
| █████ Yes              | 0.759                     | (0.393-1.467)      | 0.41    |
| Fluoroquinolone        |                           |                    |         |
| █████ No*              | 1                         |                    |         |
| █████ Yes              | 0.844                     | (0.451-1.577)      | 0.60    |
| Glycopeptide           |                           |                    |         |
| █████ No*              | 1                         |                    |         |
| █████ Yes              | 0.986                     | (0.342-2.841)      | 0.98    |
| Lincosamide            |                           |                    |         |
| █████ No*              | 1                         |                    |         |
| █████ Yes              | 0.956                     | (0.236-3.869)      | 0.95    |
| Macrolide              |                           |                    |         |
| █████ No*              | 1                         |                    |         |
| █████ Yes              | 1.318                     | (0.724-2.401)      | 0.37    |
| Polymyxin              |                           |                    |         |
| █████ No*              | 1                         |                    |         |
| █████ Yes              | 4.258                     | (0.954-18.997)     | 0.06    |
| Rifamycin              |                           |                    |         |
| █████ No*              | 1                         |                    |         |
| █████ Yes              | 0.285                     | (0.034-2.410)      | 0.25    |
| Sulfonamide            |                           |                    |         |
| █████ No*              | 1                         |                    |         |
| █████ Yes              | 1.892                     | (1.026-3.488)      | 0.0407  |
| Tetracycline           |                           |                    |         |
| █████ No*              | 1                         |                    |         |
| █████ Yes              | 1.216                     | (0.565-2.615)      | 0.62    |
| Anti-fungal            |                           |                    |         |
| █████ No*              | 1                         |                    |         |
| █████ Yes              | 2.949                     | (0.245-35.487)     | 0.39    |
| Hypertonic Saline      |                           |                    |         |
| █████ No*              | 1                         |                    |         |
| █████ Yes              | 0.430                     | (0.222-0.831)      | 0.0121  |
| Inhaled Steroid        |                           |                    |         |
| █████ No*              | 1                         |                    |         |
| █████ Yes              | 1.486                     | (0.809-2.733)      | 0.20    |
| Dornase Alfa           |                           |                    |         |
| █████ No*              | 1                         |                    |         |
| █████ Yes              | 3.267                     | (1.059-10.073)     | 0.0394  |

\* Baseline category

<sup>a</sup> Covariates in the multivariate analysis for each antibiotic included the following: Age at enrollment; Sex (Male\*, Female); Hispanic race (Hispanic\*, Non-hispanic); Genotype (F508 homozyg\*, F508 heterozyg, Other)

<sup>b</sup> Treatment exposures were evaluated for the study quarter prior to the culture under consideration.

**Table 13. SCV auxotrophic types cultured from CF subjects.**

| <b>Auxotrophy<sup>a</sup></b> | <b>MSSA-SCV (N=101)</b> | <b>MRSA-SCV (N=84)</b> | <b>Total (N=185)</b> |
|-------------------------------|-------------------------|------------------------|----------------------|
| Thymidine                     | 35 (34.7) <sup>b</sup>  | 68 (81.0)              | 103 (55.7)           |
| Hemin                         | 3 (3.0)                 | 0 (0.0)                | 3 (1.6)              |
| Menadione                     | 6 (5.9)                 | 0 (0.0)                | 6 (3.2)              |
| Fatty Acid                    | 25 (24.8)               | 2 (2.4)                | 27 (14.6)            |
| Menadione + Fatty Acid        | 1 (1.0)                 | 0 (0.0)                | 1 (0.5)              |
| Carbon Dioxide                | 4 (4.0)                 | 0 (0.0)                | 4 (2.2)              |
| No Complementation            | 19 (18.8)               | 13 (15.5)              | 32 (17.3)            |
| Not Determined                | 8 (7.9)                 | 1 (1.2)                | 9 (4.9)              |

<sup>a</sup> Auxotrophic types of SCVs. 7.3% of all SCVs did not complement with the conditions tested but showed poor growth on lab media. 79 SCVs reverted during culture, and auxotrophy could not be determined.

<sup>b</sup> Number (Percent of MSSA-SCV, MRSA-SCV, or of the Total) of each auxotrophic SCV subtype.

**Table S14. Association of SCV subtypes and GLIFEV<sub>1</sub>pp in univariate and multivariate analyses.**

| Covariate                      | Univariate          |                  |         | Multivariate |                  |         | Multivariate |                  |         |
|--------------------------------|---------------------|------------------|---------|--------------|------------------|---------|--------------|------------------|---------|
|                                | Coeff. <sup>a</sup> | 95%CI            | p-value | Coeff.       | 95%CI            | p-value | Coeff.       | 95%CI            | p-value |
| SCV Culture Status             |                     |                  |         |              |                  |         |              |                  |         |
| Never SCV Pos*                 | 0                   |                  |         | 0            |                  |         | 0            |                  |         |
| Ever Non-THYD SCV Pos          | -2.687              | (-9.152-3.778)   | 0.42    | -1.127       | (-7.458-5.203)   | 0.73    | -1.384       | (-7.617-4.849)   | 0.66    |
| Ever THYD SCV Pos              | -13.095             | (-20.090--6.100) | 0.0003  | -10.003      | (-16.862--3.144) | 0.0043  | -10.489      | (-17.249--3.730) | 0.0024  |
| Visit Number                   | -0.367              | (-0.693--0.040)  | 0.0274  | -0.365       | (-0.691--0.039)  | 0.0280  | -0.364       | (-0.690--0.038)  | 0.0284  |
| Age at Enrollment              |                     |                  |         | -1.189       | (-1.917--0.460)  | 0.0014  | -1.024       | (-1.751--0.297)  | 0.0058  |
| Sex                            |                     |                  |         |              |                  |         |              |                  |         |
| Male*                          |                     |                  |         | 0            |                  |         | 0            |                  |         |
| Female                         |                     |                  |         | -4.330       | (-8.794-0.134)   | 0.06    | -3.643       | (-8.065-0.779)   | 0.11    |
| Hispanic Race                  |                     |                  |         |              |                  |         |              |                  |         |
| Hispanic*                      |                     |                  |         | 0            |                  |         | 0            |                  |         |
| Non-Hispanic                   |                     |                  |         | -1.942       | (-12.973-9.089)  | 0.73    | -3.483       | (-14.397-7.431)  | 0.53    |
| Genotype                       |                     |                  |         |              |                  |         |              |                  |         |
| F508 Homoz*                    |                     |                  |         | 0            |                  |         | 0            |                  |         |
| F508 Heteroz                   |                     |                  |         | 4.691        | (-0.231-9.614)   | 0.06    | 4.001        | (-0.870-8.871)   | 0.11    |
| Other                          |                     |                  |         | 1.402        | (-6.250-9.053)   | 0.72    | 1.187        | (-6.345-8.720)   | 0.76    |
| CFTR Modulator                 |                     |                  |         |              |                  |         |              |                  |         |
| No*                            |                     |                  |         | 0            |                  |         | 0            |                  |         |
| Yes                            |                     |                  |         | 6.876        | (-1.865-15.617)  | 0.12    | 6.524        | (-2.083-15.131)  | 0.14    |
| <i>P. aeruginosa</i> CX Status |                     |                  |         |              |                  |         |              |                  |         |
| Never PA Pos*                  |                     |                  |         |              |                  |         | 0            |                  |         |
| Ever PA Pos                    |                     |                  |         |              |                  |         | -6.913       | (-11.921--1.904) | 0.0068  |
| Constant                       | 92.72               | (89.737-95.704)  | <0.0001 | 107.933      | (93.839-122.027) | <0.0001 | 109.421      | (95.506-123.335) | <0.0001 |

\*Baseline category

<sup>a</sup>Abbreviations: C Coefficient, CI Coeff.; CI Confidence Interval, CI; Culture, CX; THYD, Thymidine-dependent.

**Table S15. Association of SCVs with lung function based on MRSA status in univariate and multivariate analyses.**

| Covariate                      | Univariate          |                  |         | Multivariate |                   |         | Multivariate |                   |         |
|--------------------------------|---------------------|------------------|---------|--------------|-------------------|---------|--------------|-------------------|---------|
|                                | Coeff. <sup>a</sup> | 95% CI           | p-value | Coeff.       | 95% CI            | p-value | Coeff.       | 95% CI            | p-value |
| MRSA/Cx status                 |                     |                  |         |              |                   |         |              |                   |         |
| MSSA/NC*                       | 0                   |                  |         | 0            |                   |         | 0            |                   |         |
| MSSA/SCV                       | -9.409              | (-17.455--1.363) | 0.0217  | -7.773       | (-15.664--0.117)  | 0.05    | -7.924       | (-15.841--0.007)  | 0.0498  |
| MRSA/NC                        | -4.944              | (-10.499--0.610) | 0.08    | -3.869       | (-9.387--1.649)   | 0.17    | -5.115       | (-10.738--0.508)  | 0.08    |
| MRSA/SCV                       | -10.524             | (-18.205--2.842) | 0.0073  | -7.780       | (-15.439--0.122)  | 0.0461  | -8.435       | (-16.149--0.721)  | 0.0318  |
| Visit number                   | -0.379              | (-0.657--0.102)  | 0.0074  | -0.378       | (-0.655--0.101)   | 0.0075  | -0.289       | (-0.620--0.042)   | 0.09    |
| Age at enrollment              |                     |                  |         | -0.916       | (-1.694--0.138)   | 0.0209  | -0.850       | (-1.637--0.063)   | 0.0340  |
| Sex                            |                     |                  |         |              |                   |         |              |                   |         |
| Male*                          | 0                   |                  |         | 0            |                   |         | 0            |                   |         |
| Female                         |                     |                  |         | -4.863       | (-9.595--0.131)   | 0.0436  | -4.496       | (-9.303--0.311)   | 0.07    |
| Hispanic race                  |                     |                  |         |              |                   |         |              |                   |         |
| Hispanic*                      | 0                   |                  |         | 0            |                   |         | 0            |                   |         |
| Non-Hispanic                   |                     |                  |         | -3.690       | (-15.337--7.956)  | 0.54    | -4.897       | (-16.646--6.851)  | 0.41    |
| Genotype                       |                     |                  |         |              |                   |         |              |                   |         |
| 508homoz*                      | 0                   |                  |         | 0            |                   |         | 0            |                   |         |
| 508heteroz                     |                     |                  |         | 2.846        | (-2.389--8.080)   | 0.29    | 3.115        | (-2.155--8.384)   | 0.25    |
| Other                          |                     |                  |         | 0.364        | (-7.653--8.380)   | 0.93    | 0.522        | (-7.699--8.743)   | 0.90    |
| CFTR Modulator                 |                     |                  |         |              |                   |         |              |                   |         |
| No*                            | 0                   |                  |         | 0            |                   |         | 0            |                   |         |
| Yes                            |                     |                  |         | 6.663        | (-2.846--16.173)  | 0.17    | 7.339        | (-2.235--16.913)  | 0.13    |
| <i>P. aeruginosa</i> Cx status |                     |                  |         |              |                   |         |              |                   |         |
| Never PA Pos*                  | 0                   |                  |         | 0            |                   |         | 0            |                   |         |
| Ever PA Pos                    |                     |                  |         |              |                   |         | -4.769       | (-10.362--0.825)  | 0.10    |
| Constant                       | 95.407              | (91.487--99.327) | <0.0001 | 109.861      | (95.006--124.716) | <0.0001 | 111.052      | (95.970--126.134) | <0.0001 |

\*Baseline category

<sup>a</sup>Abbreviations: C Coefficient, CI Confidence Interval, Cx Culture, NC Normal Colony, NC

**Table 16. Association of SCVs and occurrence of pulmonary exacerbations based on MRSA status in univariate and multivariate analyses.**

| Covariate                      | Univariate          |        |         | Multivariate        |        |         | Multivariate        |        |         | Multivariate        |        |         |
|--------------------------------|---------------------|--------|---------|---------------------|--------|---------|---------------------|--------|---------|---------------------|--------|---------|
|                                | OR <sup>a</sup>     | 95%CI  | p-value | OR                  | 95%CI  | p-value | OR                  | 95%CI  | p-value | OR                  | 95%CI  | p-value |
| MRSA/Cx status                 |                     |        |         | 1                   |        |         |                     |        |         |                     |        |         |
| MSSA/NC*                       | 1                   |        |         | 1                   |        |         | 1                   |        |         | 1                   |        |         |
| MSSA/SCV                       | 1.131 (0.623-2.054) | 0.69   |         | 1.054 (0.588-1.890) | 0.86   |         | 1.060 (0.598-1.877) | 0.84   |         | 0.958 (0.543-1.691) | 0.88   |         |
| MRSA/NC                        | 1.623 (1.075-2.450) | 0.0212 |         | 1.538 (1.022-2.314) | 0.0389 |         | 1.443 (0.965-2.159) | 0.07   |         | 1.360 (0.914-2.026) | 0.13   |         |
| MRSA/SCV                       | 2.900 (1.641-5.125) | 0.0002 |         | 2.533 (1.445-4.442) | 0.0012 |         | 2.385 (1.375-4.136) | 0.0020 |         | 2.149 (1.244-3.713) | 0.0061 |         |
| Visit number                   | 0.928 (0.866-0.994) | 0.0323 |         | 0.930 (0.870-0.993) | 0.0312 |         | 0.929 (0.870-0.993) | 0.0305 |         | 0.928 (0.868-0.991) | 0.0269 |         |
| Age at enrollment              |                     |        |         | 1.074 (1.014-1.138) | 0.0152 |         | 1.083 (1.023-1.147) | 0.0059 |         | 1.069 (1.010-1.132) | 0.0212 |         |
| Sex                            |                     |        |         |                     |        |         |                     |        |         |                     |        |         |
| Male*                          |                     |        |         | 1                   |        |         | 1                   |        |         | 1                   |        |         |
| Female                         |                     |        |         | 1.574 (1.107-2.240) | 0.0117 |         | 1.658 (1.171-2.347) | 0.0044 |         | 1.580 (1.121-2.227) | 0.0091 |         |
| Hispanic race                  |                     |        |         |                     |        |         |                     |        |         |                     |        |         |
| Hispanic*                      |                     |        |         | 1                   |        |         | 1                   |        |         | 1                   |        |         |
| Non-Hispanic                   |                     |        |         | 0.986 (0.415-2.343) | 0.97   |         | 0.870 (0.371-2.037) | 0.75   |         | 0.833 (0.361-1.922) | 0.67   |         |
| Genotype                       |                     |        |         |                     |        |         |                     |        |         |                     |        |         |
| F508 homozyg*                  |                     |        |         | 1                   |        |         | 1                   |        |         | 1                   |        |         |
| F508 heterozyg                 |                     |        |         | 1.118 (0.761-1.643) | 0.57   |         | 1.084 (0.743-1.581) | 0.68   |         | 1.069 (0.737-1.551) | 0.72   |         |
| Other                          |                     |        |         | 0.815 (0.446-1.488) | 0.51   |         | 0.818 (0.454-1.476) | 0.51   |         | 0.763 (0.426-1.370) | 0.37   |         |
| CFTR Modulator                 |                     |        |         |                     |        |         |                     |        |         |                     |        |         |
| No*                            |                     |        |         | 1                   |        |         | 1                   |        |         | 1                   |        |         |
| Yes                            |                     |        |         | 0.565 (0.272-1.174) | 0.13   |         | 0.560 (0.273-1.149) | 0.11   |         | 0.583 (0.289-1.179) | 0.13   |         |
| <i>P. aeruginosa</i> Cx status |                     |        |         |                     |        |         |                     |        |         |                     |        |         |
| Never PA Pos*                  |                     |        |         |                     |        |         | 1                   |        |         | 1                   |        |         |
| Ever PA Pos                    |                     |        |         |                     |        |         | 0.568 (0.378-0.851) | 0.0062 |         | 0.542 (0.363-0.810) | 0.0028 |         |
| GLI FEV1 pp at enrollment      |                     |        |         |                     |        |         |                     |        |         | 0.990 (0.980-0.999) | 0.0307 |         |

\* Baseline category

<sup>a</sup> Abbreviations: OR, Odds Ratio; CI, Confidence Interval; Cx, Culture; NC, Normal Colony; SCV, S. pneumoniae Culture Variant

**Table S17. Analysis of the Association of Lung Function and History of Antibiotic Use during the Study.**

| Covariate                         | Univariate <sup>a</sup> |                    |          |
|-----------------------------------|-------------------------|--------------------|----------|
|                                   | Difference              | 95% Conf. Interval | p-value  |
| Ever treated with Aminoglycoside  |                         |                    |          |
| No*                               | 0                       |                    | ???????? |
| Yes                               | -4.89                   | (-9.63--0.15)      | 0.0395   |
| Ever treated with Beta-lactam     |                         |                    | ?        |
| No*                               | 0                       |                    | ???????? |
| Yes                               | -6.85                   | (-12.00--1.69)     | 0.0069   |
| Ever treated with Fluoroquinolone |                         |                    | ?        |
| No*                               | 0                       |                    | ???????? |
| Yes                               | -8.23                   | (-12.92--3.55)     | 0.0006   |
| Ever treated with Macrolide       |                         |                    | ?        |
| No*                               | 0                       |                    | ???????? |
| Yes                               | -3.49                   | (-8.25-1.27)       | 0.15     |
| Ever treated with Sulfonamide     |                         |                    | ?        |
| No*                               | 0                       |                    | ???????? |
| Yes                               | -2.96                   | (-7.81-1.88)       | 0.23     |
| Ever treated with Tetracycline    |                         |                    | ?        |
| No*                               | 0                       |                    | ???????? |
| Yes                               | -8.01                   | (-13.98--2.05)     | 0.0050   |

\*Baseline category

**Table S18. Analysis of the association of pulmonary exacerbation and history of antibiotic use during the study.**

| Covariate                         | Univariate |                    |         |
|-----------------------------------|------------|--------------------|---------|
|                                   | Odds Ratio | 95% Conf. Interval | p-value |
| Ever treated with Aminoglycoside  |            |                    |         |
| No*                               | 1          |                    |         |
| Yes                               | 0.533      | (0.397-0.716)      | <0.0001 |
| Ever treated with Beta-lactam     |            |                    |         |
| No*                               | 1          |                    |         |
| Yes                               | 2.586      | (1.883-3.553)      | <0.0001 |
| Ever treated with Fluoroquinolone |            |                    |         |
| No*                               | 1          |                    |         |
| Yes                               | 2.240      | (1.665-3.014)      | 0.00034 |
| Ever treated with Macrolide       |            |                    |         |
| No*                               | 1          |                    |         |
| Yes                               | 0.927      | (0.702-1.225)      | 0.59    |
| Ever treated with Sulfonamide     |            |                    |         |
| No*                               | 1          |                    |         |
| Yes                               | 3.117      | (2.344-4.145)      | <0.0001 |
| Ever treated with Tetracycline    |            |                    |         |
| No*                               | 1          |                    |         |
| Yes                               | 2.180      | (1.548-3.071)      | <0.0001 |

\*Baseline category



**Table 19. History and frequency of treatment during the study**

| Medication      | Ever Treated <sup>a</sup><br>(N=230) | Baseline <sup>b</sup><br>(N=230) | Visit1 <sup>b</sup><br>(N=230) | Visit2 <sup>b</sup><br>(N=226) | Visit3 <sup>b</sup><br>(N=221) | Visit4 <sup>b</sup><br>(N=210) | Visit5 <sup>b</sup><br>(N=183) | Visit6 <sup>b</sup><br>(N=126) | Visit7 <sup>b</sup><br>(N=45) |
|-----------------|--------------------------------------|----------------------------------|--------------------------------|--------------------------------|--------------------------------|--------------------------------|--------------------------------|--------------------------------|-------------------------------|
| Beta-lactam     | 161(70.0%) <sup>a</sup>              | 96(41.7%) <sup>b</sup>           | 51(22.2%)                      | 55(24.3%)                      | 51(23.1%)                      | 40(19.0%)                      | 37(20.2%)                      | 22(17.5%)                      | 13(28.9%)                     |
| Aminoglycoside  | 120(52.2%)                           | 88(38.3%)                        | 29(12.6%)                      | 17(7.5%)                       | 30(13.6%)                      | 29(13.8%)                      | 26(14.2%)                      | 19(15.1%)                      | 10(22.2%)                     |
| Macrolide       | 109(47.4%)                           | 93(40.4%)                        | 7(3.0%)                        | 6(2.7%)                        | 5(2.3%)                        | 4(1.9%)                        | 9(4.9%)                        | 12(9.5%)                       | 5(11.1%)                      |
| Fluoroquinolone | 101(43.9%)                           | 50(21.7%)                        | 22(9.6%)                       | 21(9.3%)                       | 23(10.4%)                      | 11(5.2%)                       | 17(9.3%)                       | 8(6.3%)                        | 0(0.0%)                       |
| Sulfonamide     | 93(40.4%)                            | 47(20.4%)                        | 26(11.3%)                      | 22(9.7%)                       | 26(11.8%)                      | 23(11.0%)                      | 13(7.1%)                       | 12(9.5%)                       | 5(11.1%)                      |
| Tetracycline    | 44(19.1%)                            | 25(10.9%)                        | 6(2.6%)                        | 7(3.1%)                        | 8(3.6%)                        | 11(5.2%)                       | 5(2.7%)                        | 3(2.4%)                        | 2(4.4%)                       |
| Glycopeptide    | 20(8.7%)                             | 10(4.3%)                         | 3(1.3%)                        | 2(0.9%)                        | 1(0.5%)                        | 1(0.5%)                        | 3(1.6%)                        | 2(1.6%)                        | 0(0.0%)                       |
| Polymyxin       | 9(3.9%)                              | 7(3.0%)                          | 2(0.9%)                        | 3(1.3%)                        | 1(0.5%)                        | 0(0.0%)                        | 3(1.6%)                        | 1(0.8%)                        | 1(2.2%)                       |
| Rifamycin       | 8(3.5%)                              | 3(1.3%)                          | 0(0.0%)                        | 1(0.4%)                        | 1(0.5%)                        | 1(0.5%)                        | 1(0.5%)                        | 1(0.8%)                        | 0(0.0%)                       |
| Oxazolidinone   | 14(6.1%)                             | 5(2.2%)                          | 2(0.9%)                        | 1(0.4%)                        | 2(0.9%)                        | 1(0.5%)                        | 3(1.6%)                        | 1(0.8%)                        | 1(2.2%)                       |
| Lincosamide     | 12(5.2%)                             | 5(2.2%)                          | 1(0.4%)                        | 1(0.4%)                        | 5(2.3%)                        | 0(0.0%)                        | 1(0.5%)                        | 1(0.8%)                        | 0(0.0%)                       |
| Nitroimidazole  | 4(1.7%)                              | 2(0.9%)                          | 1(0.4%)                        | 1(0.4%)                        | 0(0.0%)                        | 0(0.0%)                        | 0(0.0%)                        | 0(0.0%)                        | 0(0.0%)                       |
| Antifungal      | 3(1.3%)                              | 2(0.9%)                          | 0(0.0%)                        | 0(0.0%)                        | 0(0.0%)                        | 0(0.0%)                        | 2(1.1%)                        | 0(0.0%)                        | 0(0.0%)                       |
| Ethambutol      | 2(0.9%)                              | 1(0.4%)                          | 0(0.0%)                        | 0(0.0%)                        | 1(0.5%)                        | 0(0.0%)                        | 0(0.0%)                        | 0(0.0%)                        | 0(0.0%)                       |

<sup>a</sup> Number (Percent of total subjects) treated with an antibiotic from the specified drug class at any point during the study.

<sup>b</sup> Number (Percent of subjects at each study visit) treated with an antibiotic from the specified drug class.

**Table 20. Frequency of sulfonamide treatment of MSSA and MRSA culture-positive subjects during the study.**

| MRSA Cx Status | Sulfonamide Treatment   |             | Total<br>N(%) |
|----------------|-------------------------|-------------|---------------|
|                | No<br>N(%) <sup>a</sup> | Yes<br>N(%) |               |
| MSSA Pos       | 69(59.5)                | 34(40.5)    | 103(51.5)     |
| MRSA Pos       | 47(40.5)                | 50(59.5)*   | 97(48.5)      |
| <b>Total</b>   | 116(100)                | 84(100)     | 200(100)      |

<sup>a</sup>Number (Percent) of subjects treated (Yes) or not treated (No) with sulfonamides.

Pearson Chi-square(1) = 7.0464

\*Sulfonamide treatment significantly higher in MRSA vs. MSSA Cx positive subjects (p-value = 0.0079).

Table S21. STROBE Statement.

|                           | Item No | Recommendation                                                                                                                                                                                                                                                                                                                                                                                                                                                         | Comment                                                                                                                                                                                             |
|---------------------------|---------|------------------------------------------------------------------------------------------------------------------------------------------------------------------------------------------------------------------------------------------------------------------------------------------------------------------------------------------------------------------------------------------------------------------------------------------------------------------------|-----------------------------------------------------------------------------------------------------------------------------------------------------------------------------------------------------|
| <b>Title and abstract</b> | 1       | (a) Indicate the study's design with a commonly used term in the title or the abstract                                                                                                                                                                                                                                                                                                                                                                                 | Indicated in the Abstract                                                                                                                                                                           |
|                           |         | (b) Provide in the abstract an informative and balanced summary of what was done and what was found                                                                                                                                                                                                                                                                                                                                                                    | Provided in the Abstract                                                                                                                                                                            |
| <b>Introduction</b>       |         |                                                                                                                                                                                                                                                                                                                                                                                                                                                                        |                                                                                                                                                                                                     |
| Background/rationale      | 2       | Explain the scientific background and rationale for the investigation being reported                                                                                                                                                                                                                                                                                                                                                                                   | Explained in the Introduction, paragraphs 5 and 6.                                                                                                                                                  |
| Objectives                | 3       | State specific objectives, including any prespecified hypotheses                                                                                                                                                                                                                                                                                                                                                                                                       | Stated in the Introduction, paragraph 6.                                                                                                                                                            |
| <b>Methods</b>            |         |                                                                                                                                                                                                                                                                                                                                                                                                                                                                        |                                                                                                                                                                                                     |
| Study design              | 4       | Present key elements of study design early in the paper                                                                                                                                                                                                                                                                                                                                                                                                                | Presented in the Abstract, subsection "Methods", and Methods, subsection "Study Design"                                                                                                             |
| Setting                   | 5       | Describe the setting, locations, and relevant dates, including periods of recruitment, exposure, follow-up, and data collection                                                                                                                                                                                                                                                                                                                                        | Described in the Methods, subsection "Study Design"                                                                                                                                                 |
| Participants              | 6       | (a) <i>Cohort study</i> —Give the eligibility criteria, and the sources and methods of selection of participants. Describe methods of follow-up<br><i>Case-control study</i> —Give the eligibility criteria, and the sources and methods of case ascertainment and control selection. Give the rationale for the choice of cases and controls<br><i>Cross-sectional study</i> —Give the eligibility criteria, and the sources and methods of selection of participants | Described in the Methods, subsection "Study Design"                                                                                                                                                 |
|                           |         | (b) <i>Cohort study</i> —For matched studies, give matching criteria and number of exposed and unexposed<br><i>Case-control study</i> —For matched studies, give matching criteria and the number of controls per case                                                                                                                                                                                                                                                 | N/A                                                                                                                                                                                                 |
| Variables                 | 7       | Clearly define all outcomes, exposures, predictors, potential confounders, and effect modifiers. Give diagnostic criteria, if applicable                                                                                                                                                                                                                                                                                                                               | Described in the Methods, subsections "Study Design", "Prevalence and correlates of infection with SCVs", and "Analysis of the association of SCVs, lung function, and pulmonary exacerbation risk" |
| Data sources/measurement  | 8*      | For each variable of interest, give sources of data and details of methods of assessment (measurement). Describe comparability of assessment methods if there is more than one group                                                                                                                                                                                                                                                                                   | Described in the Methods, subsections "Statistical methods", "Prevalence and correlates of infection with SCVs", and "Analysis of the association of SCVs, lung                                     |

|                        |     |                                                                                                                                                                                                                                                                                                           |                                                                                                                                                                                                            |
|------------------------|-----|-----------------------------------------------------------------------------------------------------------------------------------------------------------------------------------------------------------------------------------------------------------------------------------------------------------|------------------------------------------------------------------------------------------------------------------------------------------------------------------------------------------------------------|
|                        |     |                                                                                                                                                                                                                                                                                                           | function, and pulmonary exacerbation risk"                                                                                                                                                                 |
| Bias                   | 9   | Describe any efforts to address potential sources of bias                                                                                                                                                                                                                                                 | Described in Methods, subsection "Statistical methods"                                                                                                                                                     |
| Study size             | 10  | Explain how the study size was arrived at                                                                                                                                                                                                                                                                 | Described in Methods, subsection "Statistical methods"                                                                                                                                                     |
| Quantitative variables | 11  | Explain how quantitative variables were handled in the analyses. If applicable, describe which groupings were chosen and why                                                                                                                                                                              | Described in Methods, subsection "Statistical methods"                                                                                                                                                     |
| Statistical methods    | 12  | (a) Describe all statistical methods, including those used to control for confounding                                                                                                                                                                                                                     | Described in Methods, subsection "Statistical methods"                                                                                                                                                     |
|                        |     | (b) Describe any methods used to examine subgroups and interactions                                                                                                                                                                                                                                       | Described in the Methods, subsections "Statistical methods", "Prevalence and correlates of infection with SCVs", and "Analysis of the association of SCVs, lung function, and pulmonary exacerbation risk" |
|                        |     | (c) Explain how missing data were addressed                                                                                                                                                                                                                                                               | N/A                                                                                                                                                                                                        |
|                        |     | (d) <i>Cohort study</i> —If applicable, explain how loss to follow-up was addressed<br><i>Case-control study</i> —If applicable, explain how matching of cases and controls was addressed<br><i>Cross-sectional study</i> —If applicable, describe analytical methods taking account of sampling strategy | N/A                                                                                                                                                                                                        |
|                        |     | (e) Describe any sensitivity analyses                                                                                                                                                                                                                                                                     | N/A                                                                                                                                                                                                        |
| <b>Results</b>         |     | <b>Comment</b>                                                                                                                                                                                                                                                                                            |                                                                                                                                                                                                            |
| Participants           | 13* | (a) Report numbers of individuals at each stage of study—eg numbers potentially eligible, examined for eligibility, confirmed eligible, included in the study, completing follow-up, and analysed                                                                                                         | Described in the Methods, subsections "Study Design" and Results, paragraph 1                                                                                                                              |
|                        |     | (b) Give reasons for non-participation at each stage                                                                                                                                                                                                                                                      |                                                                                                                                                                                                            |
|                        |     | (c) Consider use of a flow diagram                                                                                                                                                                                                                                                                        | Supplementary Figure S2                                                                                                                                                                                    |
| Descriptive data       | 14* | (a) Give characteristics of study participants (eg demographic, clinical, social) and information on exposures and potential confounders                                                                                                                                                                  | Described in the Methods, subsections "Study Design", and Table 1                                                                                                                                          |
|                        |     | (b) Indicate number of participants with missing data for each variable of interest                                                                                                                                                                                                                       | Described in the Methods, subsections "Statistical methods",                                                                                                                                               |
|                        |     | (c) <i>Cohort study</i> —Summarise follow-up time (eg, average and total amount)                                                                                                                                                                                                                          | Described in the Methods, subsections "Study Design", and Results, paragraph 1                                                                                                                             |

|                          |     |                                                                                                                                                                                                              |                                                                                                                                                                                                 |
|--------------------------|-----|--------------------------------------------------------------------------------------------------------------------------------------------------------------------------------------------------------------|-------------------------------------------------------------------------------------------------------------------------------------------------------------------------------------------------|
| Outcome data             | 15* | <i>Cohort study</i> —Report numbers of outcome events or summary measures over time                                                                                                                          | Described in Results                                                                                                                                                                            |
|                          |     | <i>Case-control study</i> —Report numbers in each exposure category, or summary measures of exposure                                                                                                         | N/A                                                                                                                                                                                             |
|                          |     | <i>Cross-sectional study</i> —Report numbers of outcome events or summary measures                                                                                                                           | N/A                                                                                                                                                                                             |
| Main results             | 16  | (a) Give unadjusted estimates and, if applicable, confounder-adjusted estimates and their precision (eg, 95% confidence interval). Make clear which confounders were adjusted for and why they were included | Described in Results and presented in Table 2 and 3 and Supplementary Tables S6, S7, S8, S10, S11, S12, S14, S15, S16, S17 and S18.                                                             |
|                          |     | (b) Report category boundaries when continuous variables were categorized                                                                                                                                    | Described in Results and presented in Figures 1-2 and Table 3, Supplemental Tables S2, S3, S4, S5, S6, S7, S8, S9, S10, S11, S12, S13, S14, S15, S16, S17, S18, S20, and Supplemental Figure 2. |
|                          |     | (c) If relevant, consider translating estimates of relative risk into absolute risk for a meaningful time period                                                                                             | N/A                                                                                                                                                                                             |
| Other analyses           | 17  | Report other analyses done—eg analyses of subgroups and interactions, and sensitivity analyses                                                                                                               | Described in Results                                                                                                                                                                            |
| <b>Discussion</b>        |     |                                                                                                                                                                                                              |                                                                                                                                                                                                 |
| Key results              | 18  | Summarise key results with reference to study objectives                                                                                                                                                     | Described in Discussion, paragraphs 1-3                                                                                                                                                         |
| Limitations              | 19  | Discuss limitations of the study, taking into account sources of potential bias or imprecision. Discuss both direction and magnitude of any potential bias                                                   | Described in Discussion, paragraphs 5-6                                                                                                                                                         |
| Interpretation           | 20  | Give a cautious overall interpretation of results considering objectives, limitations, multiplicity of analyses, results from similar studies, and other relevant evidence                                   | Described in Conclusion                                                                                                                                                                         |
| Generalisability         | 21  | Discuss the generalisability (external validity) of the study results                                                                                                                                        | Described in Conclusion                                                                                                                                                                         |
| <b>Other information</b> |     |                                                                                                                                                                                                              |                                                                                                                                                                                                 |
| Funding                  | 22  | Give the source of funding and the role of the funders for the present study and, if applicable, for the original study on which the present article is based                                                | Described in Acknowledgements                                                                                                                                                                   |
